# Supplementary material for: Flavivirus Attenuation via Targeting the Specific Disulfide Bond of NS1 Protein to Promote Its Degradation
Source: Research Square preprint supplement (doi:10.21203/rs.3.rs-8067540/v1), 2025-11-17
Supplement: Supplementary file 1 [file 816be210ae761c2e2c98f7d9.pdf]

## Supplementary Information

---

### **Flavivirus Attenuation via Targeting the Specific Disulfide Bond of NS1 Protein to Promote Its Degradation**

---

## Table of Contents

|                             |   |
|-----------------------------|---|
| Supplementary Figure 1..... | 3 |
| Supplementary Figure 2..... | 4 |
| Supplementary Figure 3..... | 5 |

## Supplementary Figure 1.

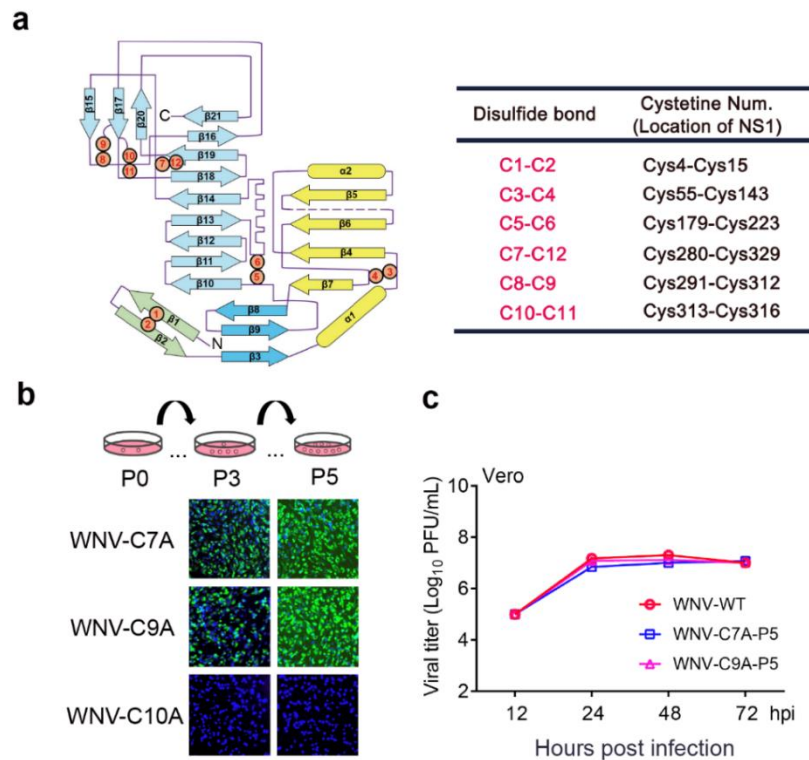

**Fig. S1 Serial passaging of the rescued viruses and validation of reverse mutations**

**a**, Topology diagram for NS1 monomer, the corresponding cysteines positions and their pairing for disulfide bonds were shown.

**b**, Supernatants from rescued WNV-C7A, -C9A and -C10A viruses were serially passaged in Vero cells for 5 rounds. IFA detection of the E protein using 4G2 antibody at different passages.

**c**, Vero cells were infected with either WNV-WT, WNV-C7A-P5 or WNV-C9A-P5 at an MOI of 5. The supernatants were harvested at the indicated time points, and viral titers were determined by plaque assay.

## Supplementary Figure 2.

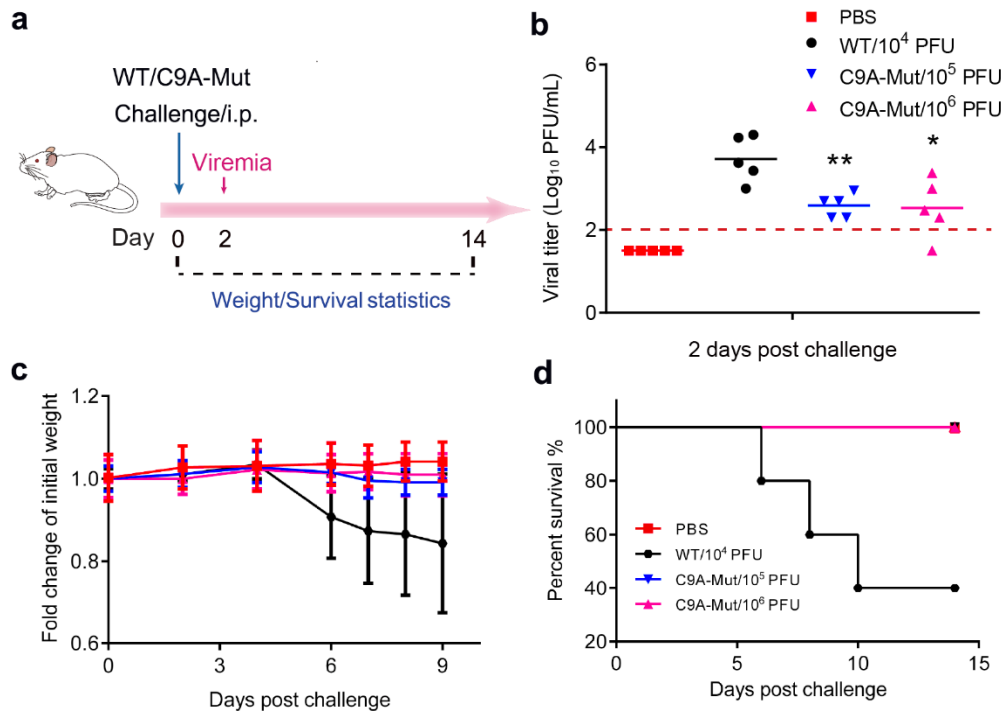

**Fig. S2 WNV-C9A-Mut was highly attenuated in BALB/c mice.**

**a**, Groups of 4-week-old BALB/c mice (n=5 per group) were challenged i.p. with PBS, 10<sup>4</sup> PFU of WT WNV, 10<sup>5</sup>/10<sup>6</sup> PFU of WNV-C9A-Mut.

**b**, Viral titers in mice serum at 2 dpi were detected via plaque assay.

**c, d**, Body weights and survival rates of these mice were monitored after infection.

## Supplementary Figure 3.

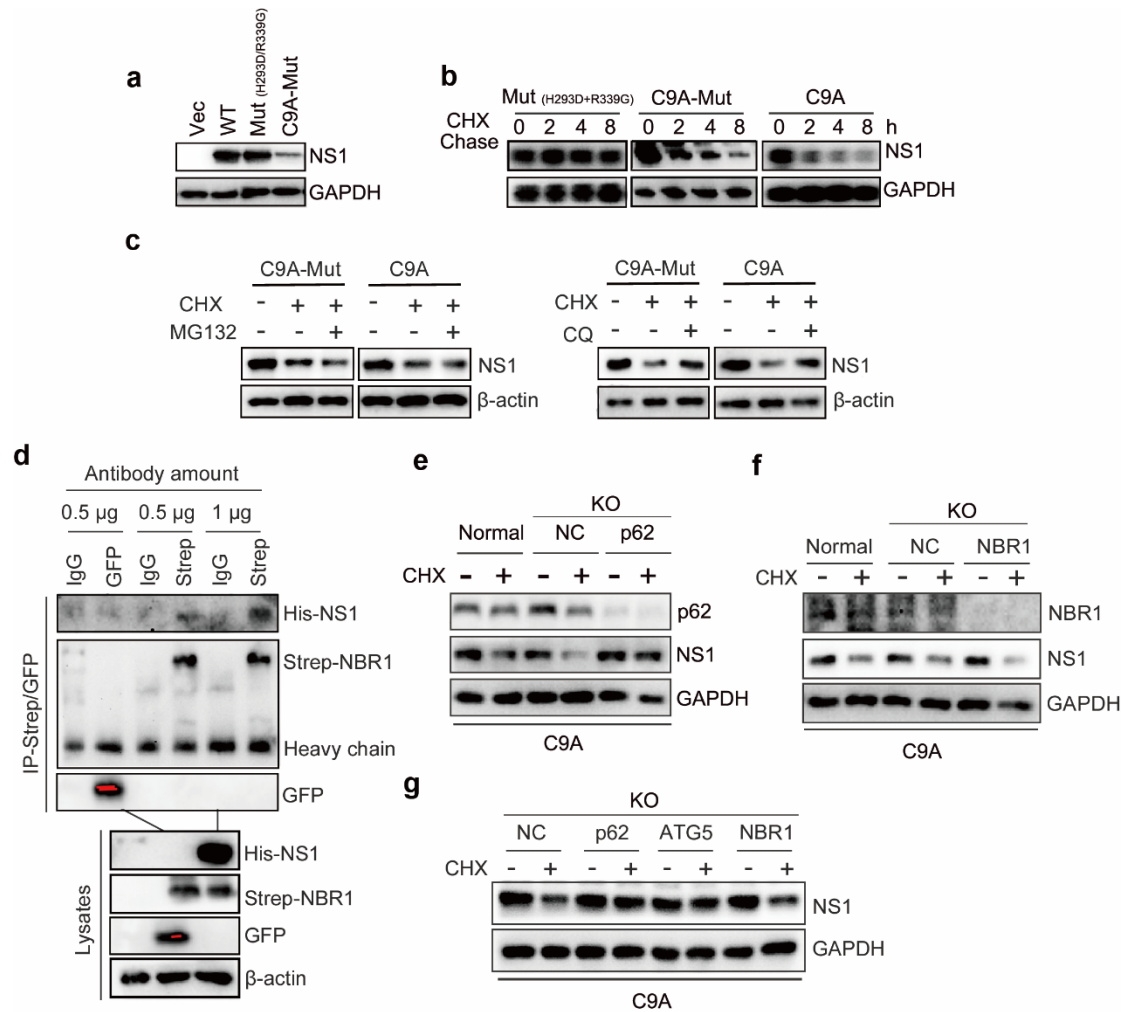

**Fig. S3 NS1-C9A or WNV-C9A-Mut did not cause higher levels of autophagy than WT. NBR1 was not the cargo receptor of mediating NS1-C9A selective autophagy.**

**a**, HEK-293T cells were transfected with plasmids expressing HA-tagged NS1-WT, NS1-Mut (H293D/R339G) and NS1-C9A-Mmut for 24 h, then the protein levels were detected by immunoblotting.

**b**, HEK-293T cells were transfected with HA-tagged NS1-Mut (H293D/R339G), NS1-C9A-Mut and NS1-C9A for 24 h, then the cells were treated with CHX (40 μg/ml) and harvested at the time points as indicated. The protein levels were detected by immunoblotting.

**c**, HEK-293T cells were transfected with NS1-C9A-Mut or NS1-C9A for 24 h and then treated by CHX (40 μg/ml) along with MG132 (80 μM) or chloroquine (CQ) (40 μM) for 8 h. The cell lysates were then analyzed by immunoblotting analysis.

**d**, HEK-293T cells were co-transfected with His-NS1-C9A or GFP and strep-tagged NBR1 for 24 h, followed by immunoprecipitation with protein A/G beads. The WCL and IP precipitates were analyzed by immunoblotting with antibodies indicated.

**e**, His-NS1-C9A protein was transfected into Normal, NC or p62 KO HEK-293T cells for 24 h, followed by CHX (40 µg/ml) treatment for 8 h. Cell lysates were then immunoblotted with indicated antibodies.

**f**, His-NS1-C9A protein was transfected into Normal, NC or NBR1 KO HEK-293T cells for 24 h, followed by CHX (40 µg/ml) treatment for 8 h. The cell lysates were immunoblotted with indicated antibodies.

**g**, NC, p62, ATG5 or NBR1 KO HEK-293T cells were transfected with His-tagged NS1-C9A for 24 h. The cell lysates were then analyzed by immunoblotting analysis.
